# Supplementary material for: Aberrant causal inference and presence of a compensatory mechanism in autism spectrum disorder
Source: eLife journal article supplement (doi:10.7554/elife.71866), 2022-05-17

**A**

Inferred response  
 .... explicit task

Inferred  
 same/different cause

perceived disparity

sensory observations

veridical disparity  
 (experimenter defined)

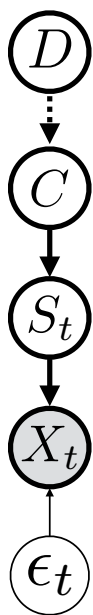**B**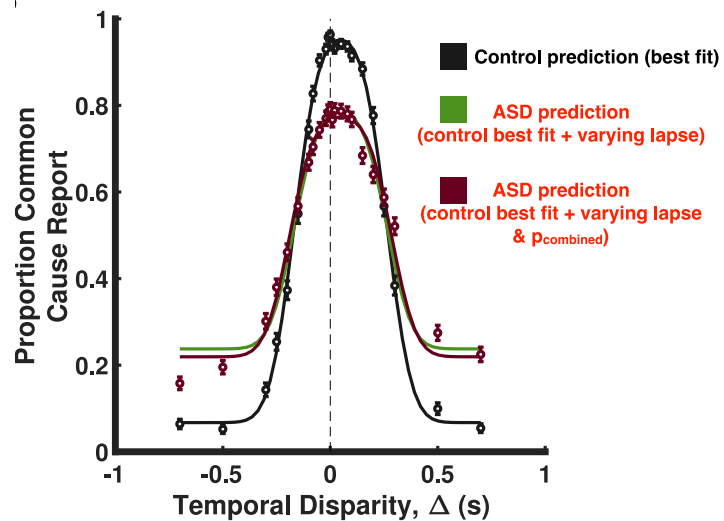**C**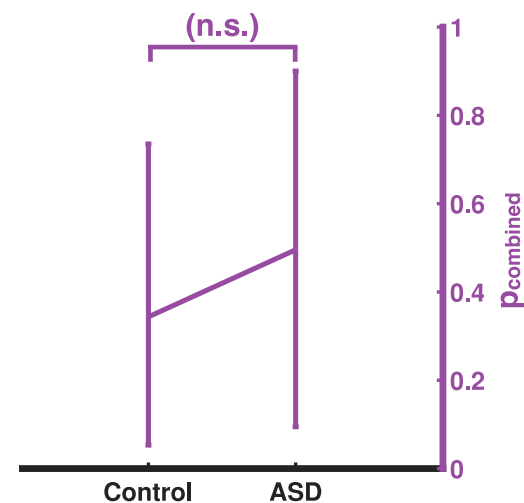**D**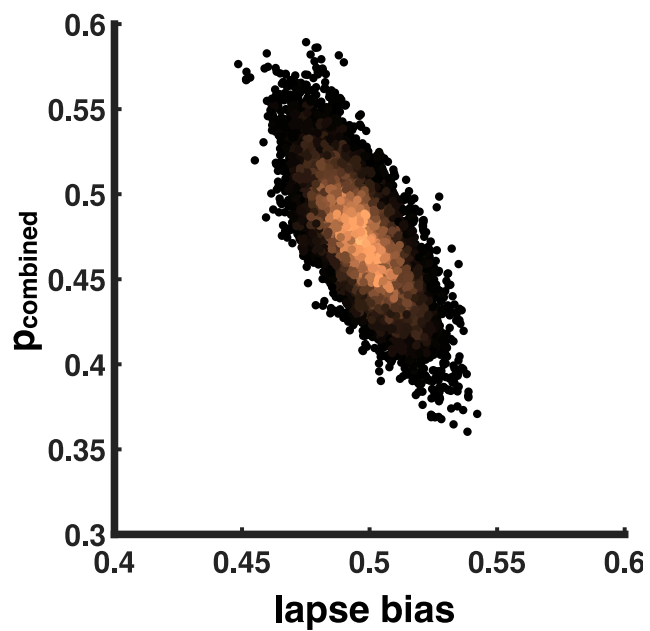**E**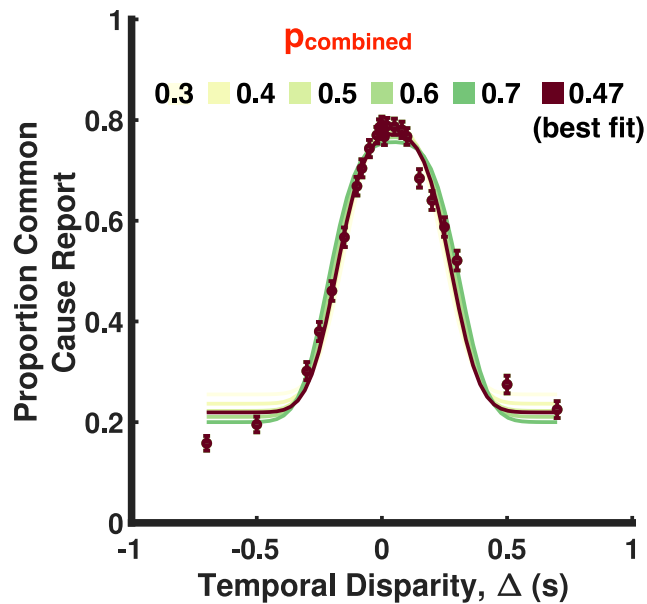**F**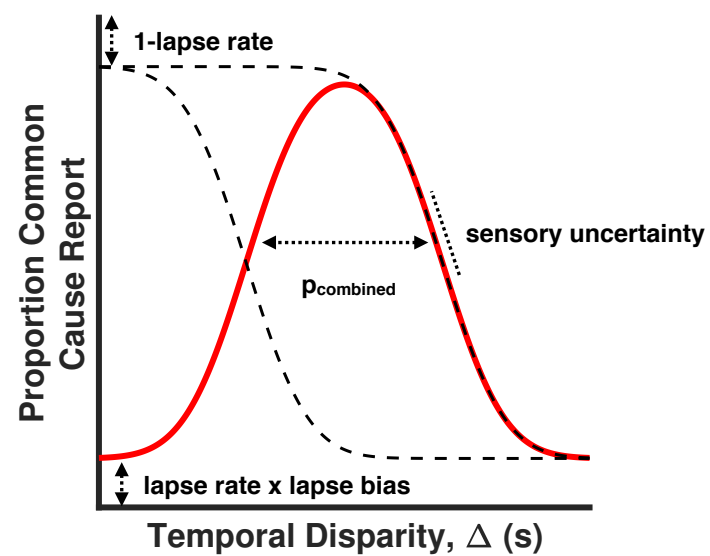

Supplement: supp [file elife-71866-supp-v1.zip]
