# Supplementary material for: Aberrant causal inference and presence of a compensatory mechanism in autism spectrum disorder
Source: eLife journal article supplement (doi:10.7554/elife.71866), 2022-05-17

**A. Control aggregate subject ( $\Delta AIC$  relative to causal inference model = 53.7)**

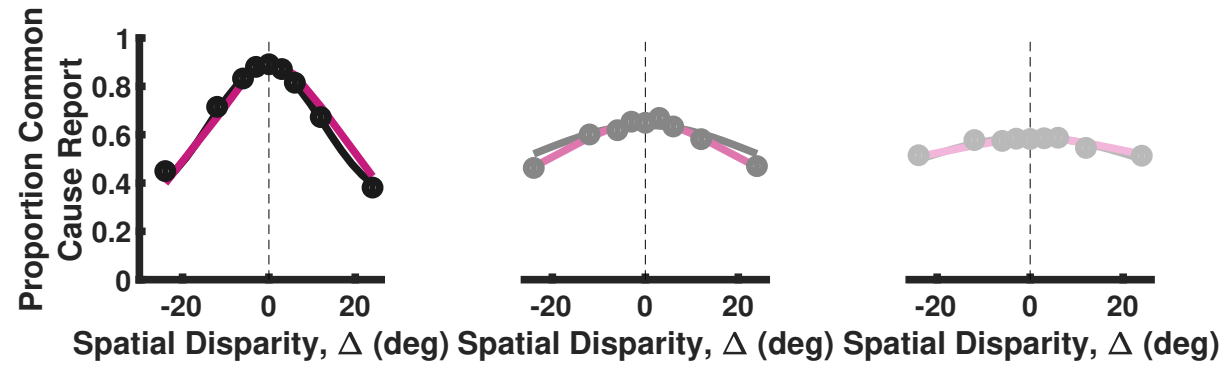

**B. ASD aggregate subject where the functional form was fit to the control and the bias was varied ( $\Delta AIC$  with causal inference model fit to control and varying lapse rate, lapse bias,  $p_{\text{common}}$ ,  $p_{\text{choice}}$  = 75.9)**

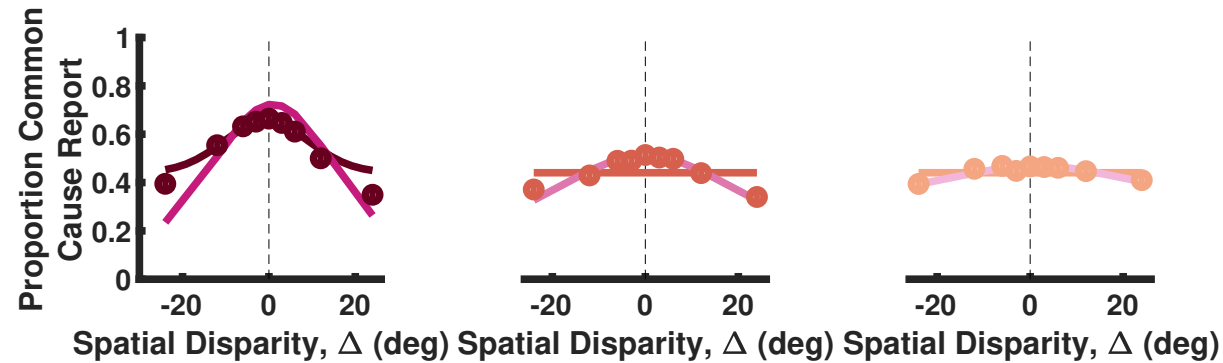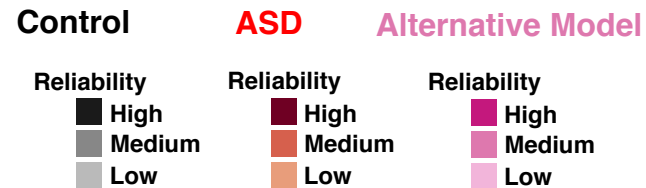

Supplement: supp [file elife-71866-supp-v1.zip]
