# Supplementary material for: Aberrant causal inference and presence of a compensatory mechanism in autism spectrum disorder
Source: eLife journal article supplement (doi:10.7554/elife.71866), 2022-05-17

Sensory uncertainty, lapse rate and bias, and  $p_{\text{choice}}$  are free (but  $p_{\text{common}}$  is not)  
 ( $\Delta\text{AIC}$  relative to varying lapse rate, lapse bias  $P_{\text{common}}$ ,  $P_{\text{choice}} = 687$ )

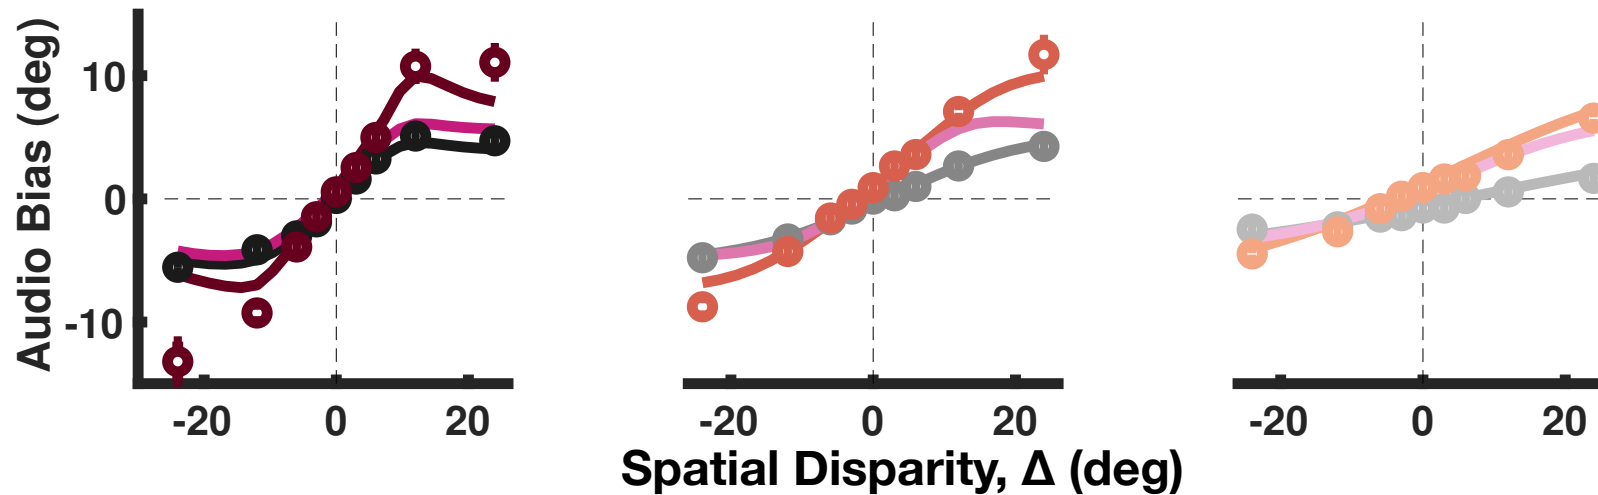

**Control**

**ASD**

**Alternative Model**

Reliability

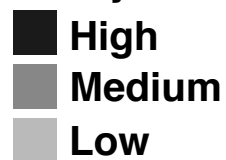

Reliability

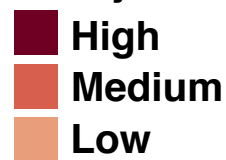

Reliability

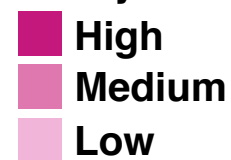

Supplement: supp [file elife-71866-supp-v1.zip]
