# Supplementary material for: Aberrant causal inference and presence of a compensatory mechanism in autism spectrum disorder
Source: eLife journal article supplement (doi:10.7554/elife.71866), 2022-05-17
Supplement: supp [file elife-71866-supp-v1.zip]

**Control**      **ASD**

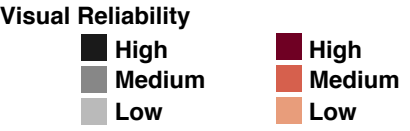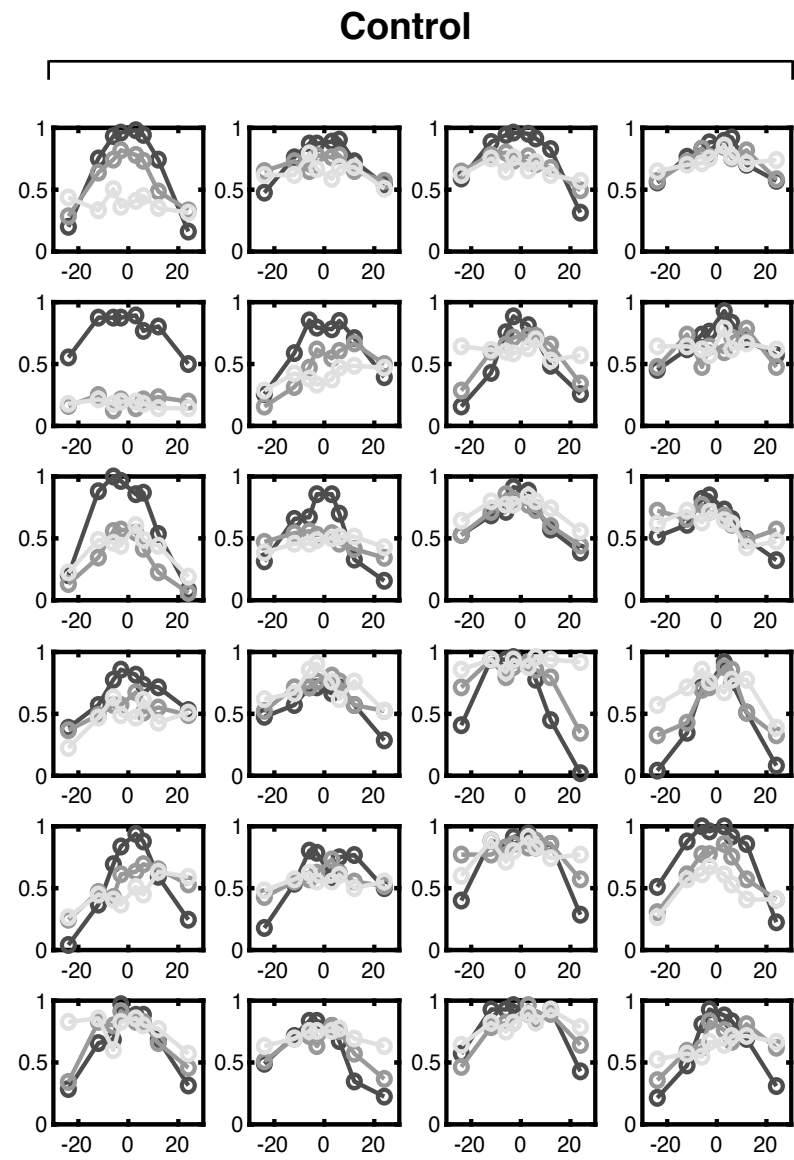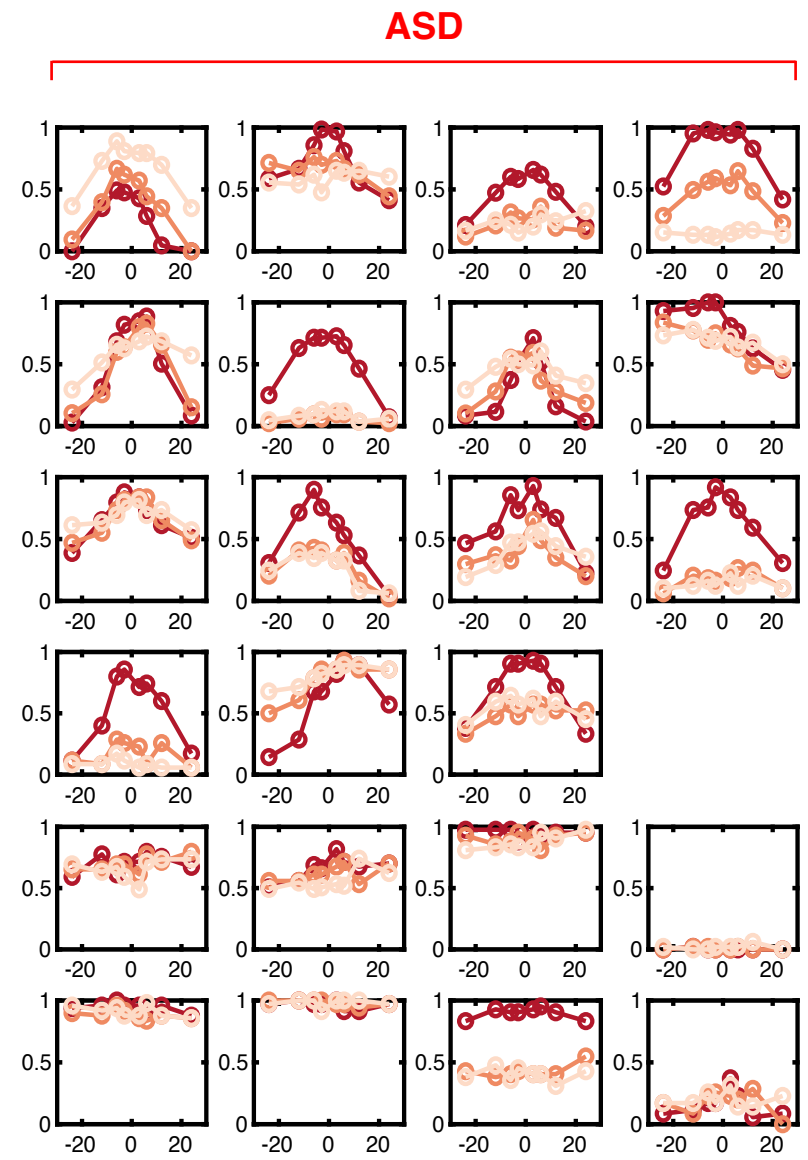

**Reports of  
Common Cause  
Modulated by  
Disparity**

**Reports of  
Common Cause  
NOT Modulated by  
Disparity**
