# Supplementary material for: Aberrant causal inference and presence of a compensatory mechanism in autism spectrum disorder
Source: eLife journal article supplement (doi:10.7554/elife.71866), 2022-05-17
Supplement: supp [file elife-71866-supp-v1.zip]

**A****Threshold**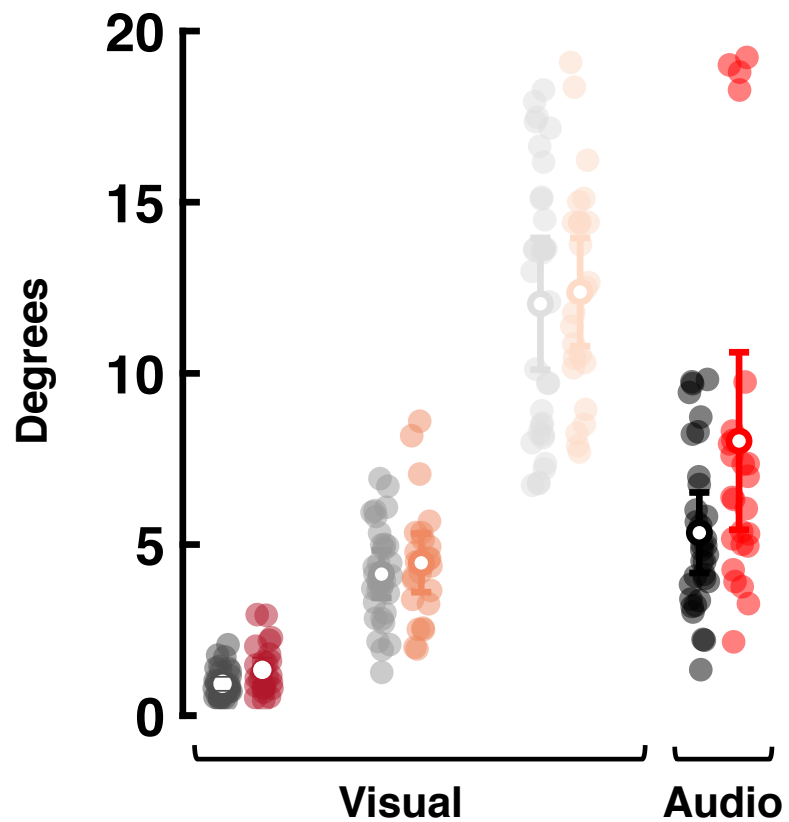**B****Bias**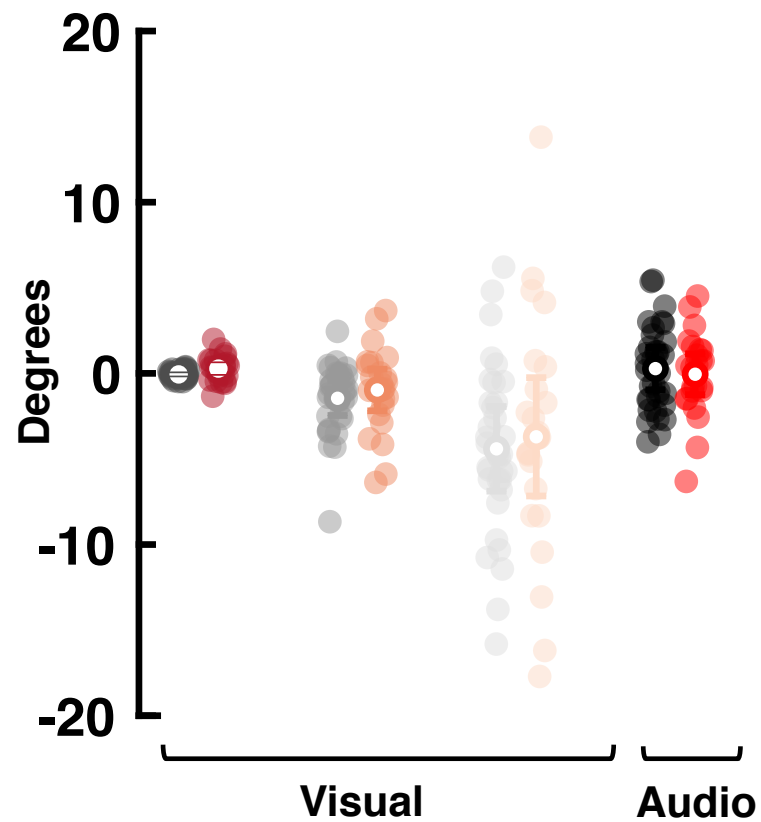**C****R-Squared**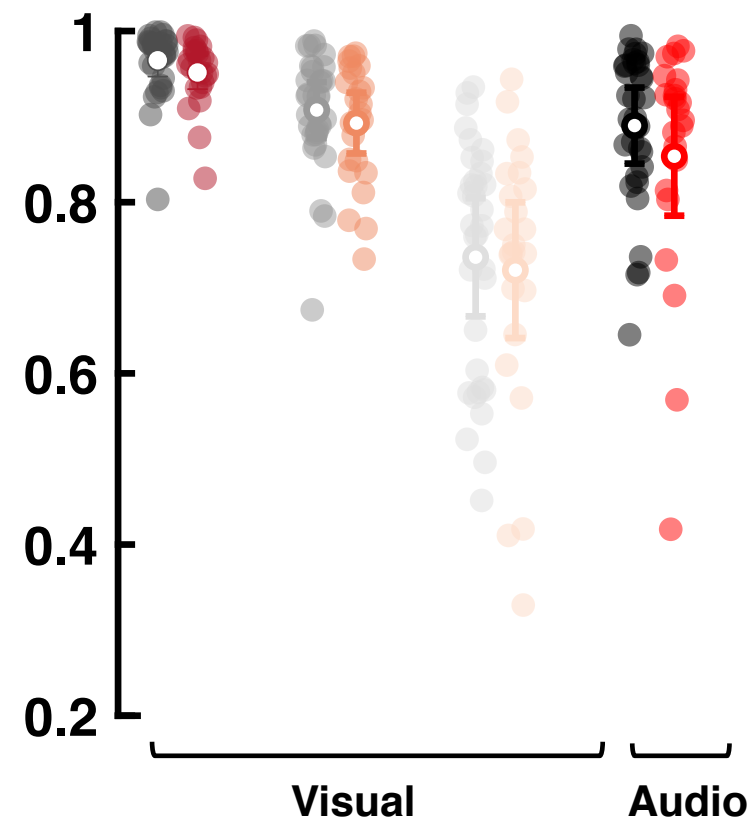**Control**

Audio  
Visual  
High  
Medium  
Low

**ASD**

Audio  
Visual  
High  
Medium  
Low
