# Supplementary material for: Aberrant causal inference and presence of a compensatory mechanism in autism spectrum disorder
Source: eLife journal article supplement (doi:10.7554/elife.71866), 2022-05-17
Supplement: supp [file elife-71866-supp-v1.zip]

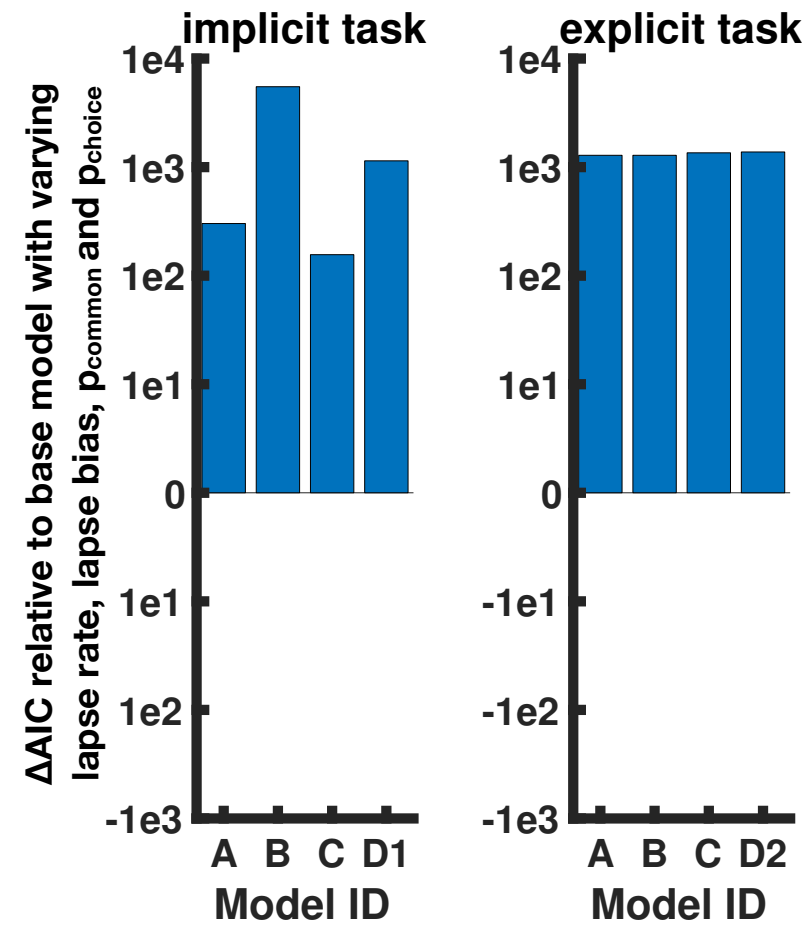

A. Forced fusion (all parameters are free, except for C, which is fixed to 1).

B. Forced segregation (all parameters are free, except for C, which is fixed to 2).

C. Lapse rate, p<sub>common</sub>, p<sub>choice</sub> are free with uniform lapse bias

D1. Lapse rate and bias, and p<sub>choice</sub> are free (but p<sub>common</sub> and sensory parameters are not).

D2. Lapse rate and bias are free (but p<sub>Combined</sub> and sensory parameters are not).
