# Supplementary material for: Aberrant causal inference and presence of a compensatory mechanism in autism spectrum disorder
Source: eLife journal article supplement (doi:10.7554/elife.71866), 2022-05-17

**A. Forced fusion (all parameters are free, except for C, which is fixed to**

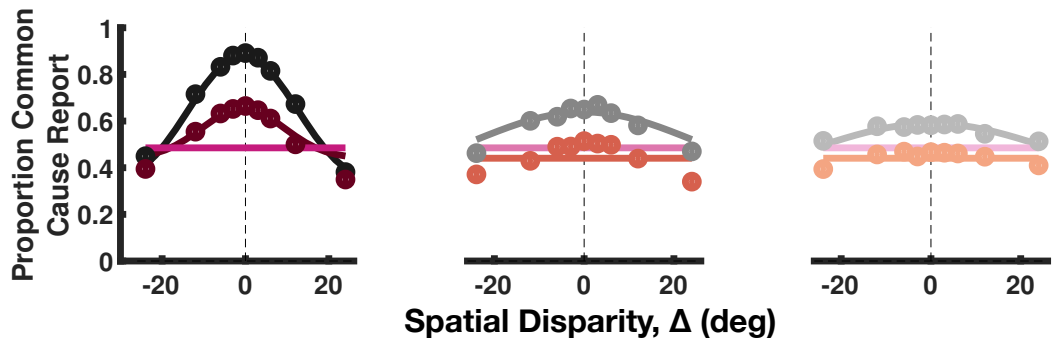

**B. Forced segregation (all parameters are free, except for C, which is fixed to 2).**

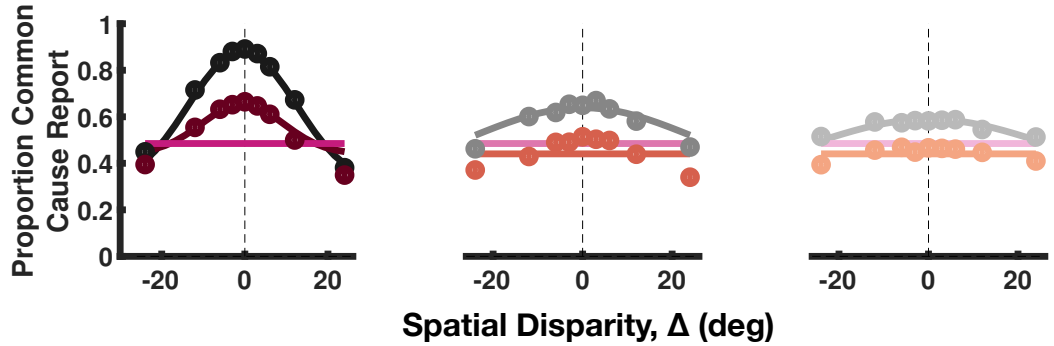

**C. Lapse rate,  $p_{\text{common}}$ ,  $p_{\text{choice}}$  are free with uniform lapse bias**

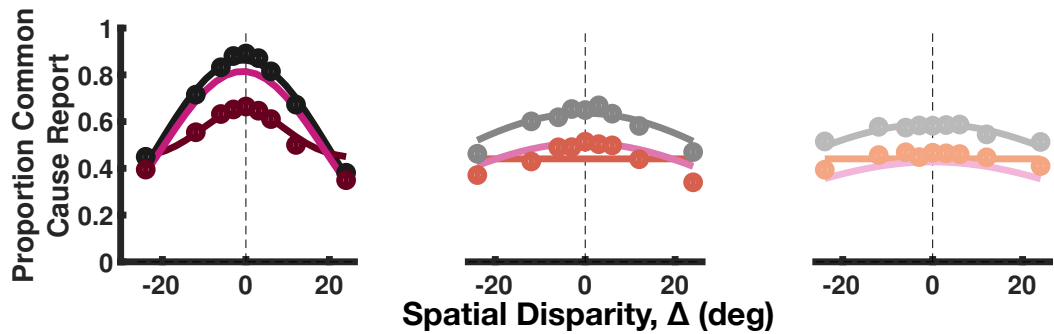

**D2. Lapse rate and bias are free (but  $p_{\text{combined}}$  and sensory uncertainty are not).**

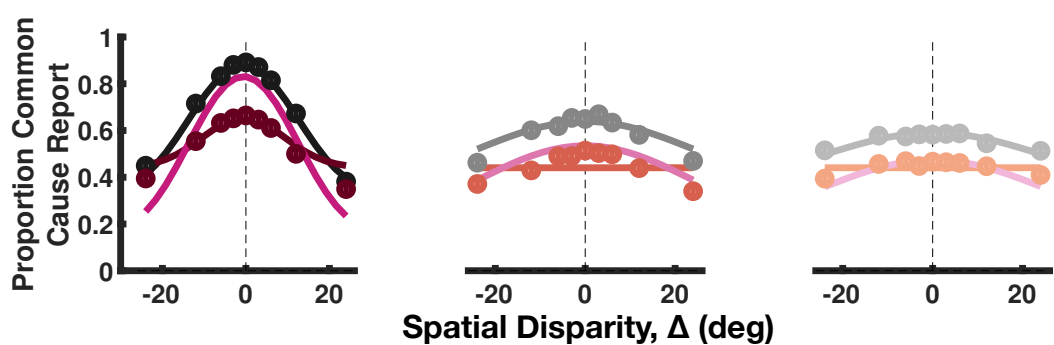

**Control**

**ASD**

**Alternative Model**

Reliability

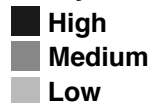

Reliability

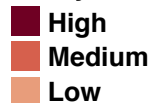

Reliability

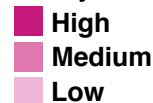

Supplement: supp [file elife-71866-supp-v1.zip]
