# Supplementary material for: Aberrant causal inference and presence of a compensatory mechanism in autism spectrum disorder
Source: eLife journal article supplement (doi:10.7554/elife.71866), 2022-05-17

**A. All parameters free ( $\Delta AIC$  relative to varying lapse rate, lapse bias  $p_{\text{common}}$ ,  $p_{\text{choice}} = -241.8$ )**

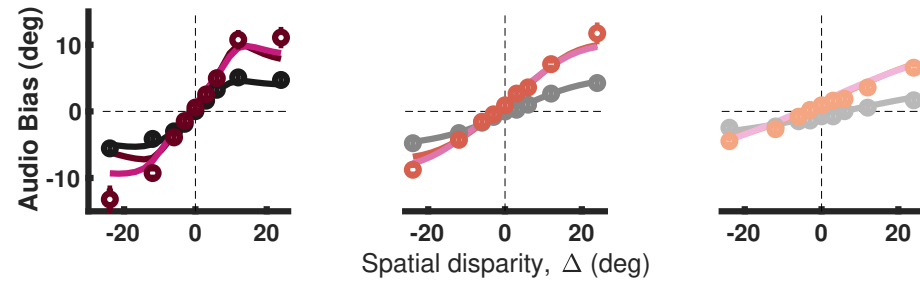

**B. Lapse rate, lapse bias  $p_{\text{common}}$ ,  $p_{\text{choice}}$  are free with reliabilities fit individually ( $\Delta AIC$  relative to fitting all reliabilities together = -24.8)**

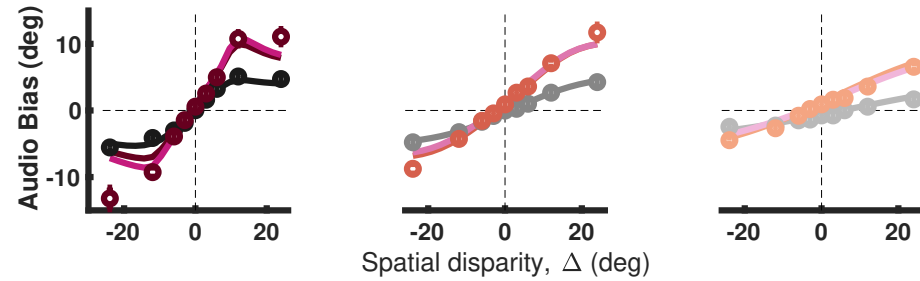

**C. All parameters free and all reliabilities fit separately ( $\Delta AIC$  relative to varying lapse rate, lapse bias  $p_{\text{common}}$ ,  $p_{\text{choice}} = -214.1$ )**

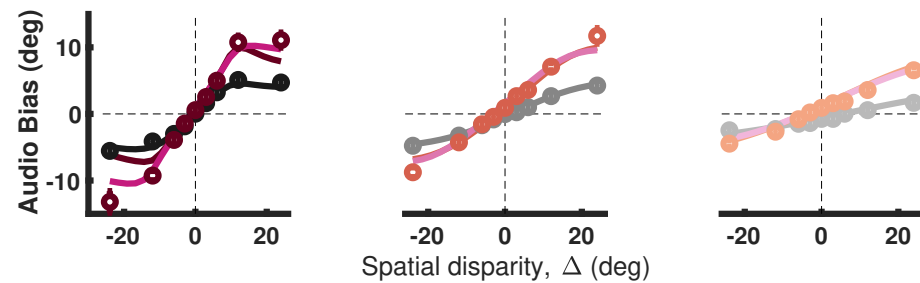

**Control**

**ASD**

**Alternative Model**

Reliability

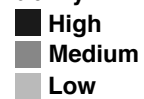

Reliability

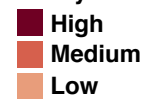

Reliability

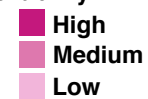

Supplement: supp [file elife-71866-supp-v1.zip]
