# Supplementary figures and images for: Aberrant causal inference and presence of a compensatory mechanism in autism spectrum disorder
Source: eLife journal article supplement (doi:10.7554/elife.71866), 2022-05-17

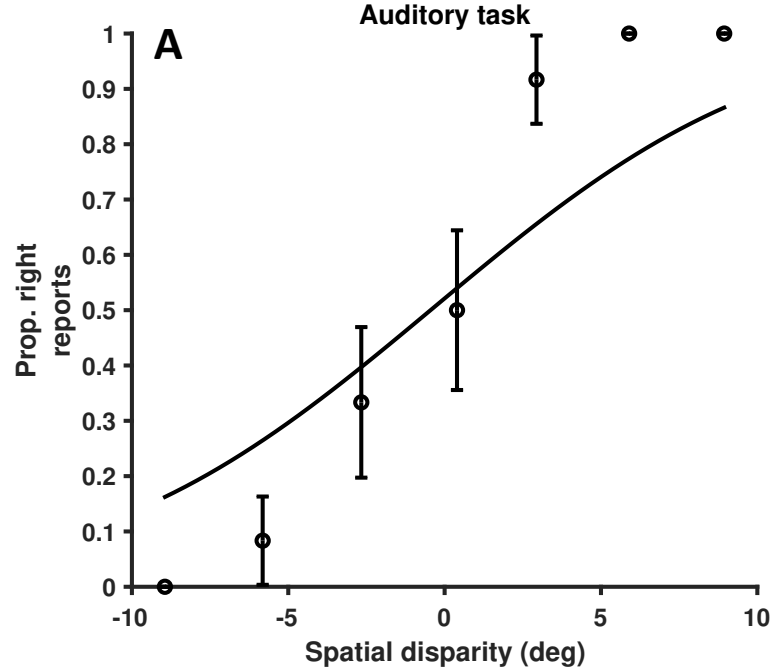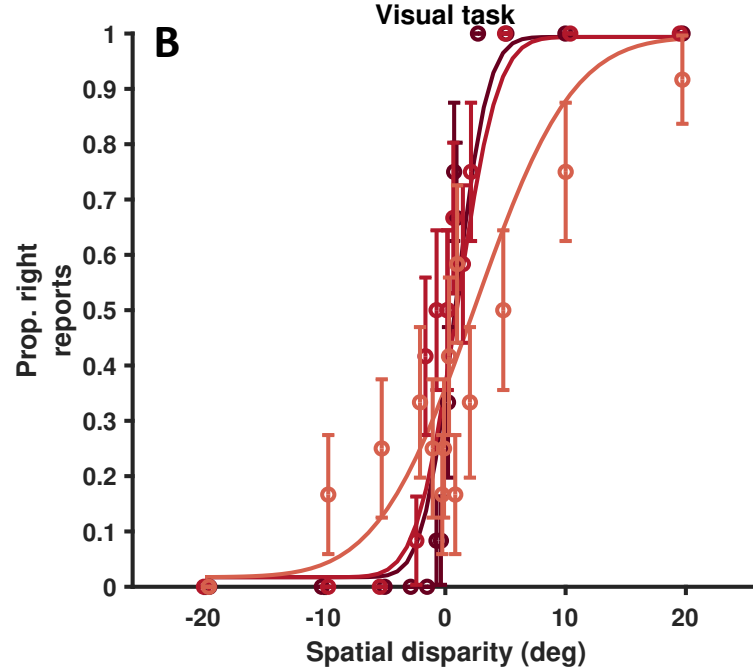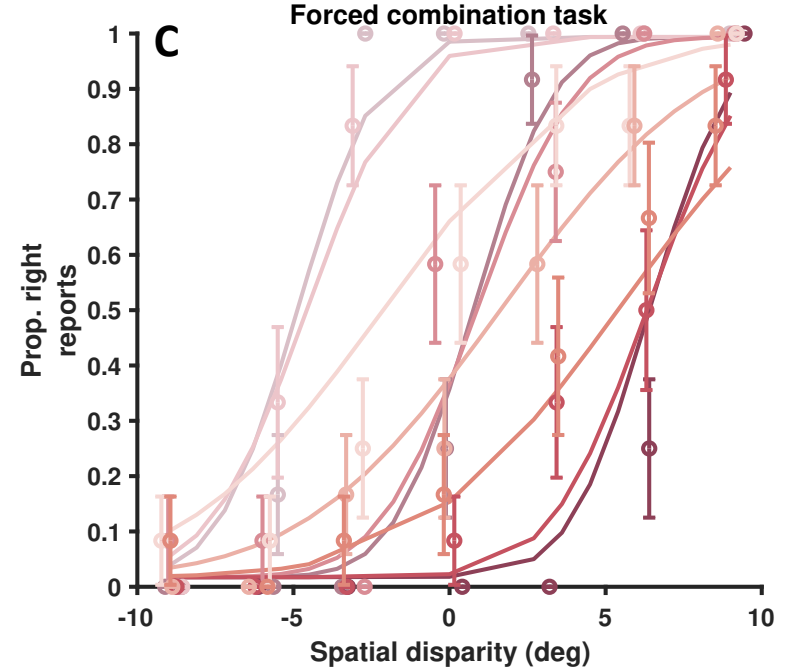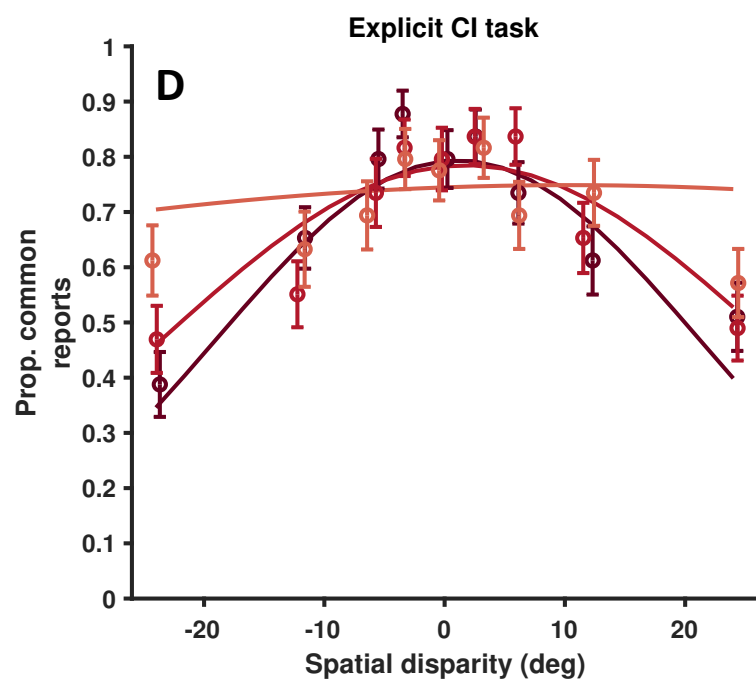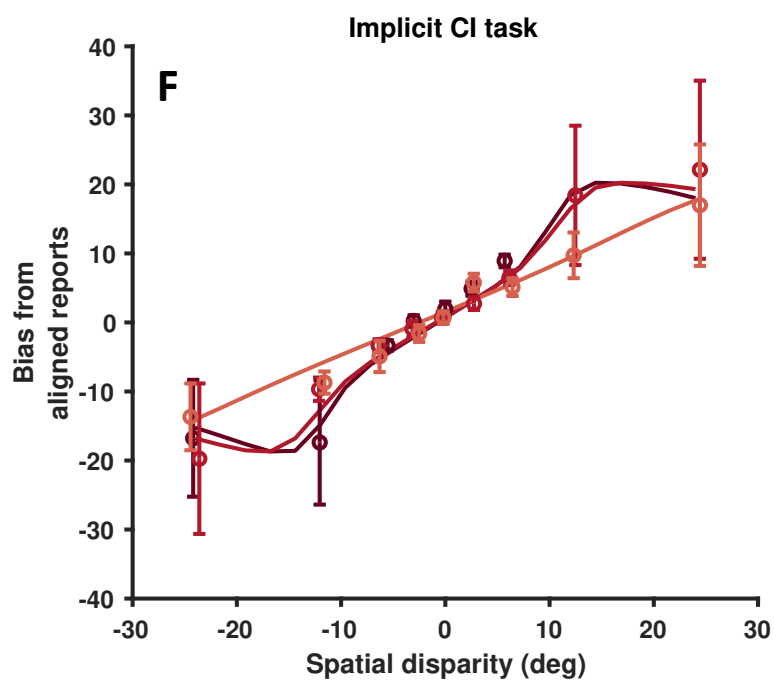

Supplement: supp [file elife-71866-supp-v1.zip]

**A**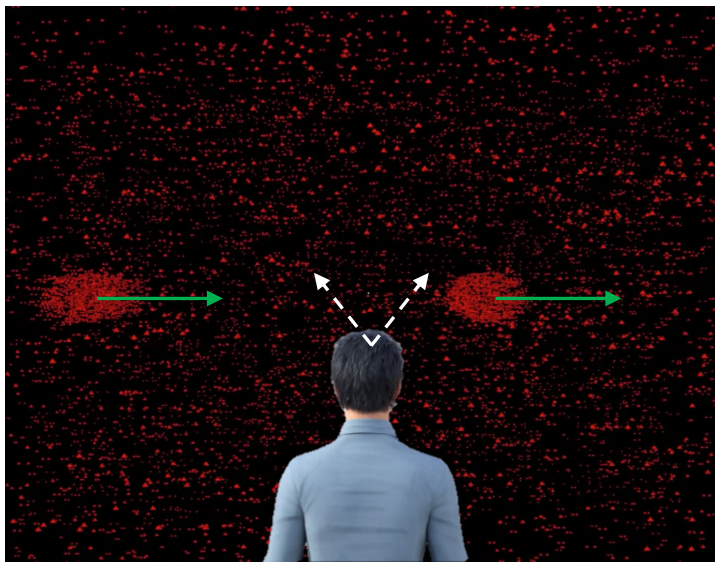**B**

Audio-visual  
discrimination (main text)

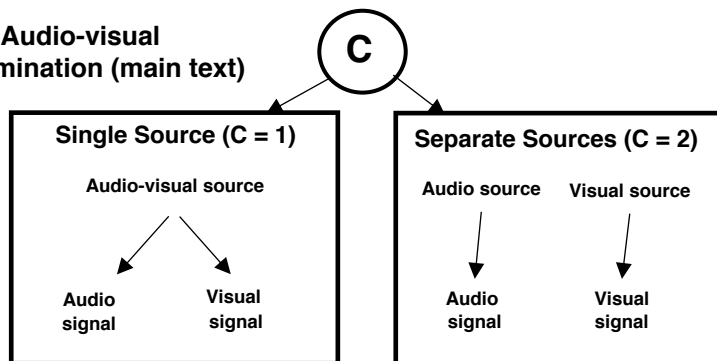

Heading discrimination  
(here)

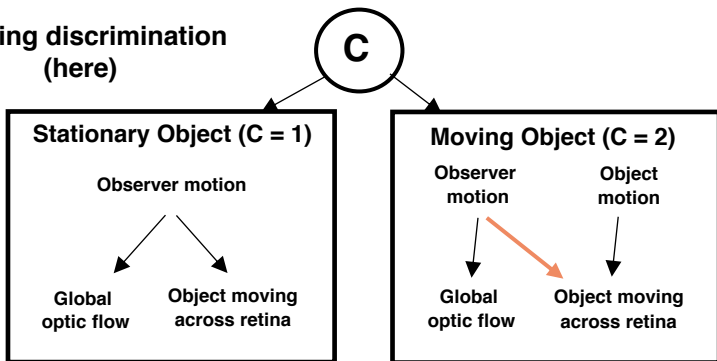**C**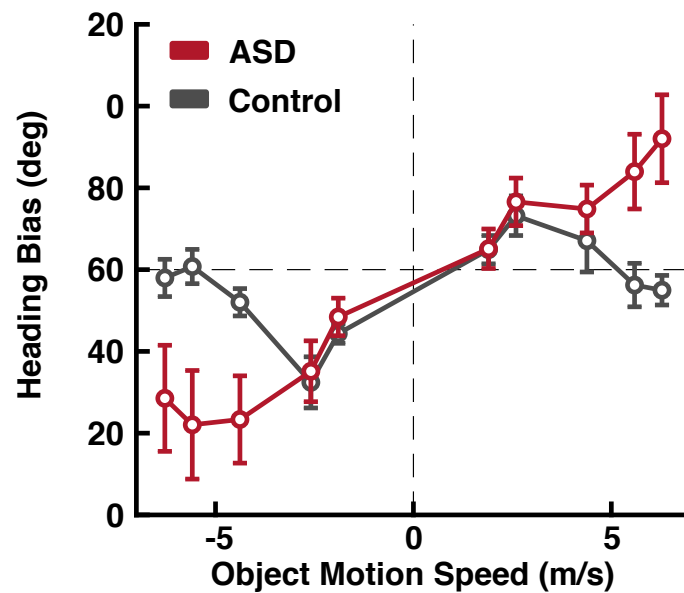**D**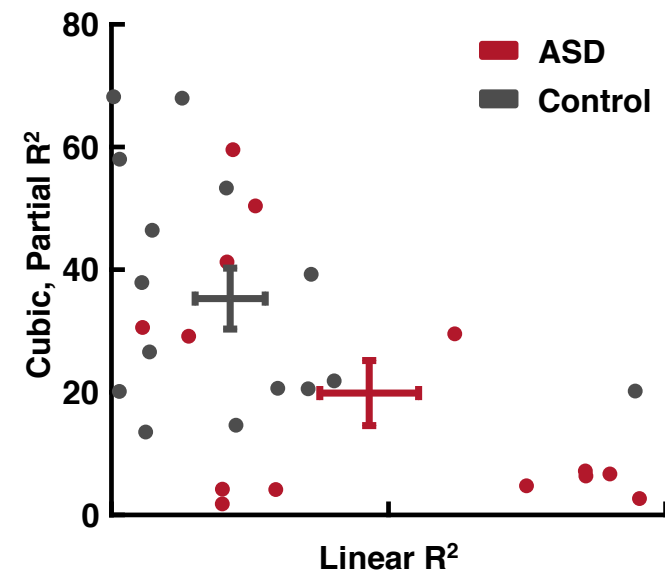**E**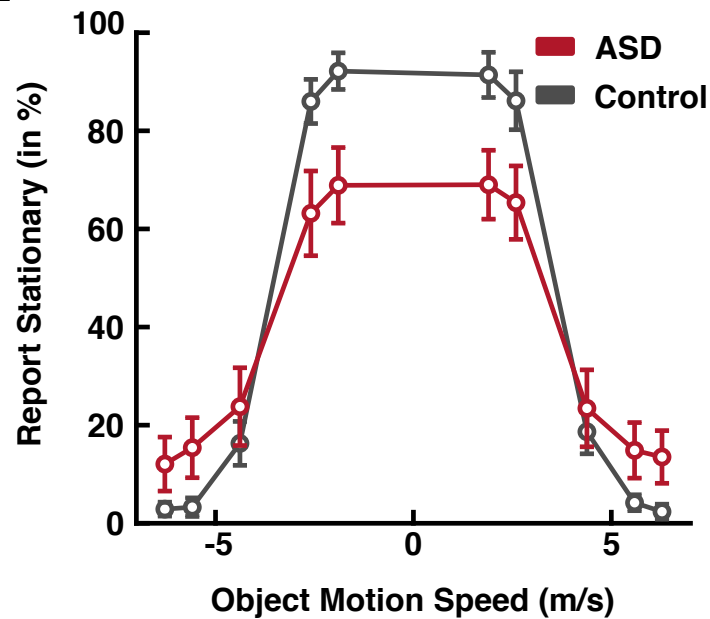**F**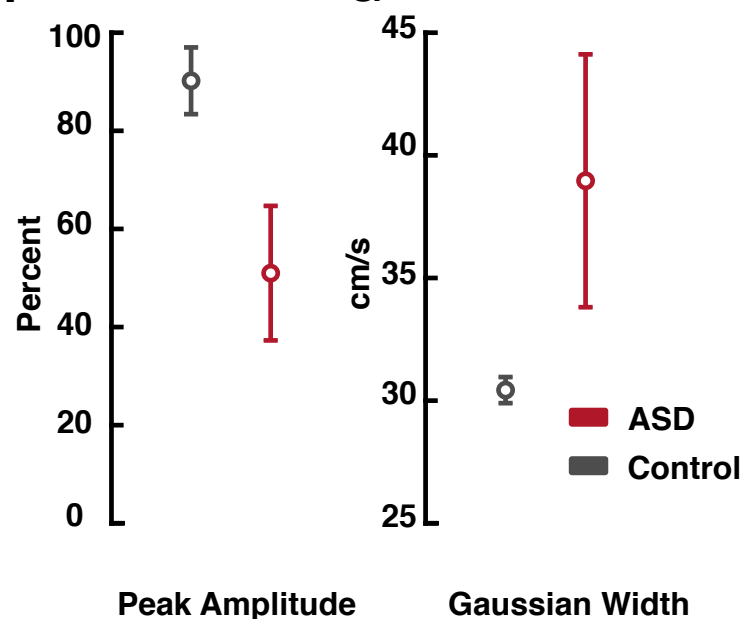

Supplement: supp [file elife-71866-supp-v1.zip]

**A**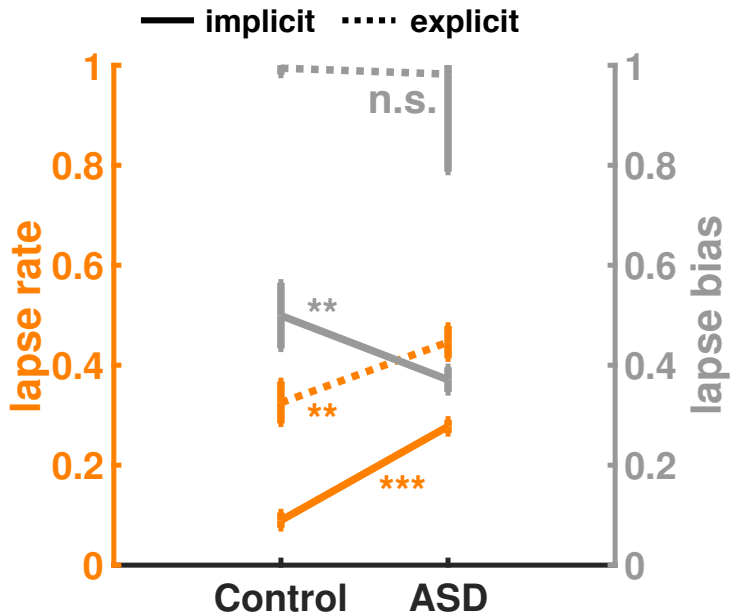**B**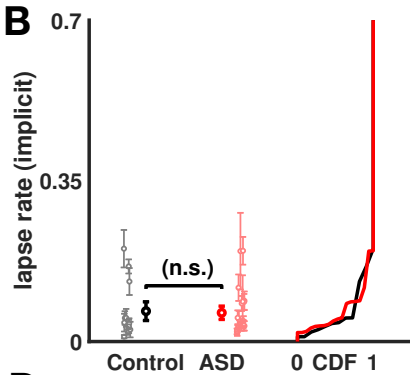**C**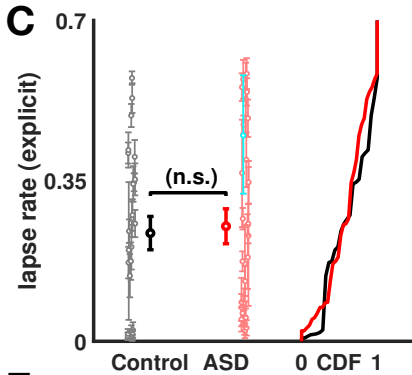**D**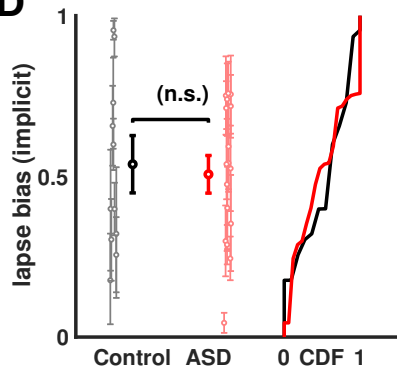**E**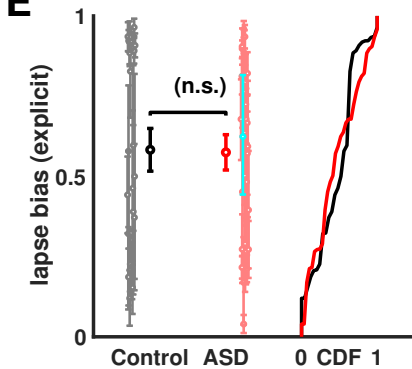

Supplement: supp [file elife-71866-supp-v1.zip]

Aggregate Data Fits

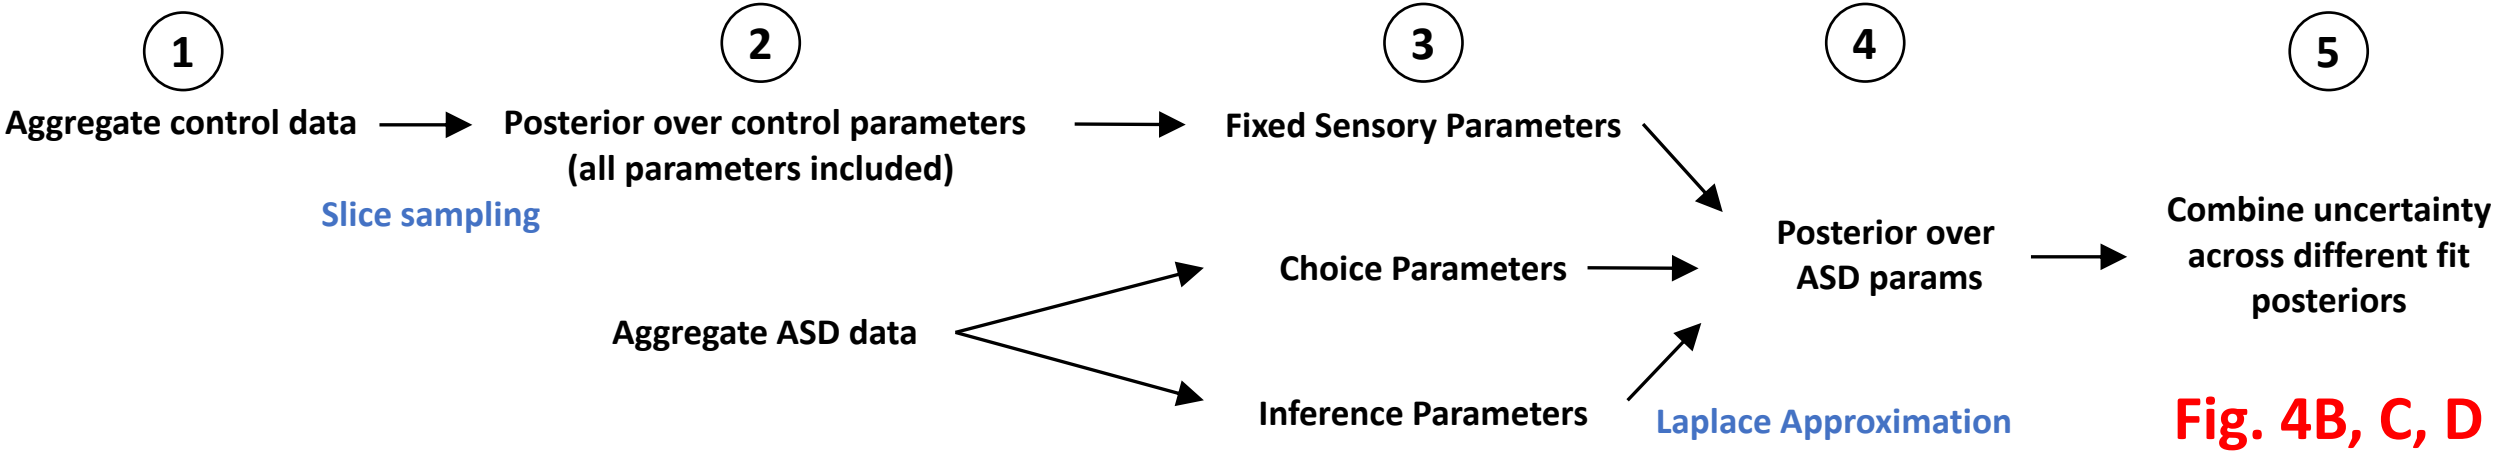

Individual Subject Fits

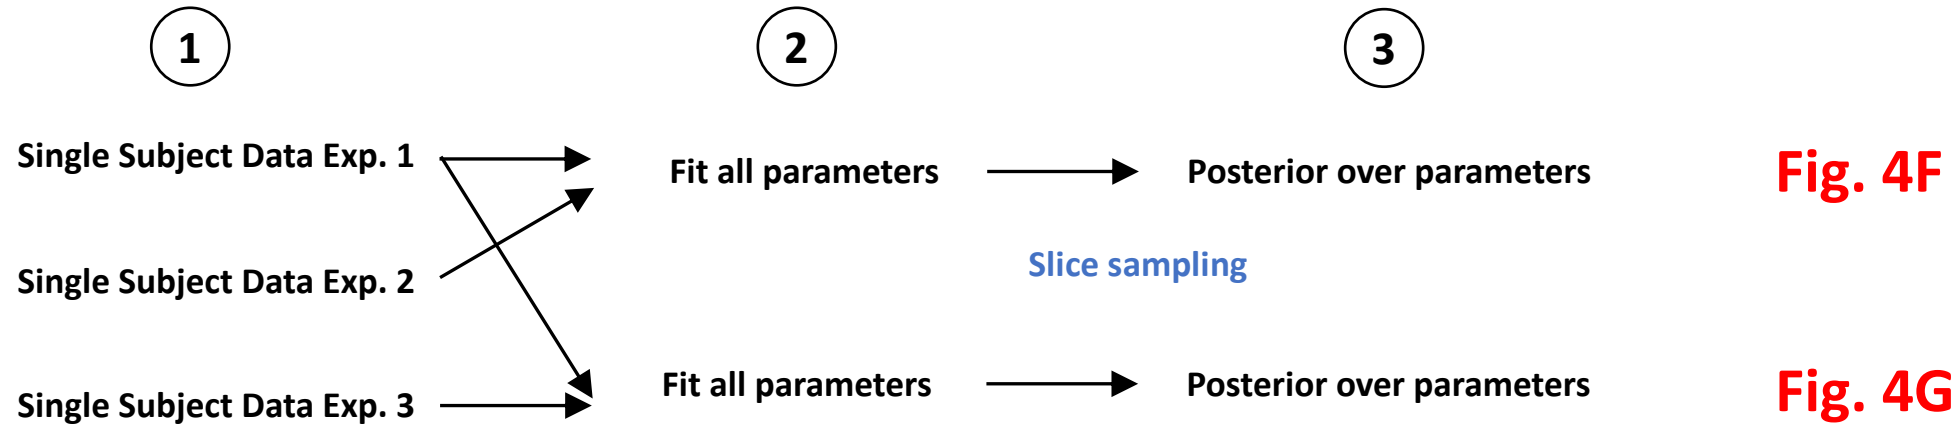

Supplement: supp [file elife-71866-supp-v1.zip]

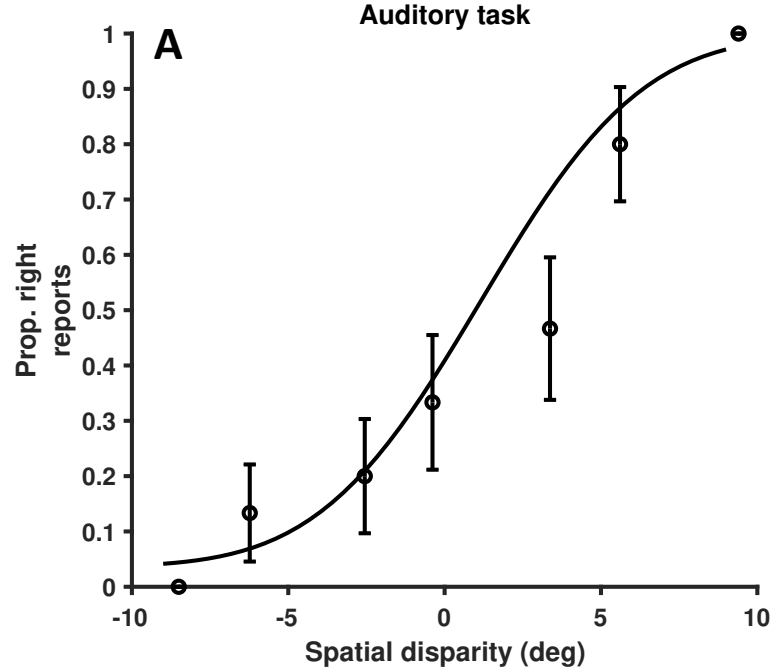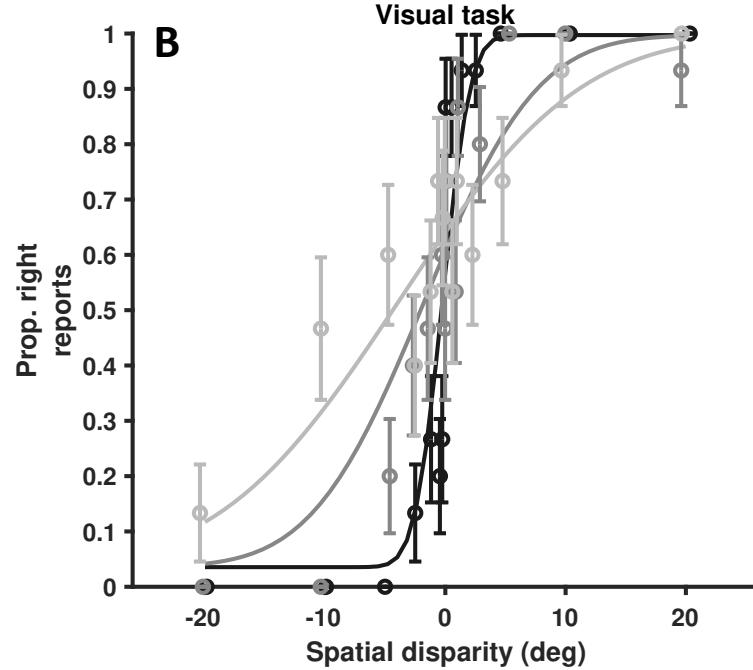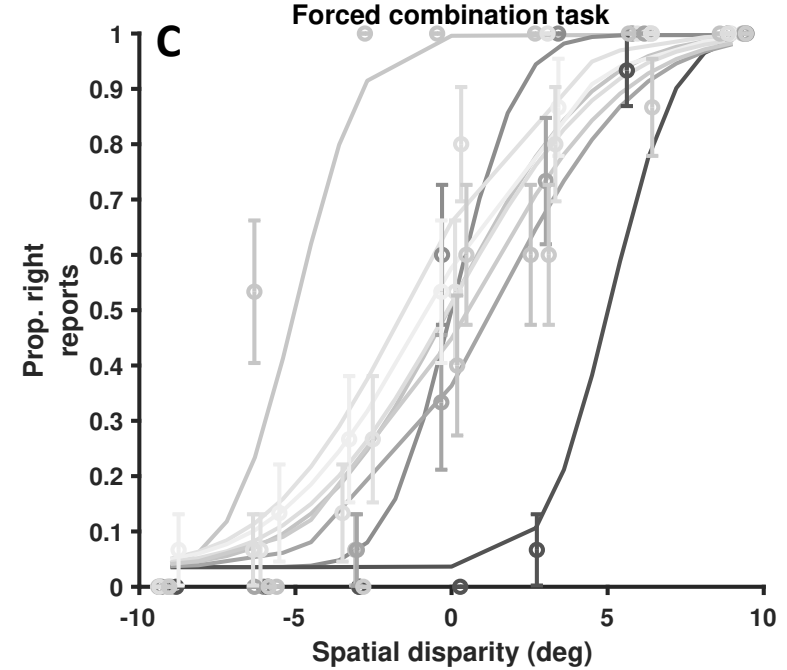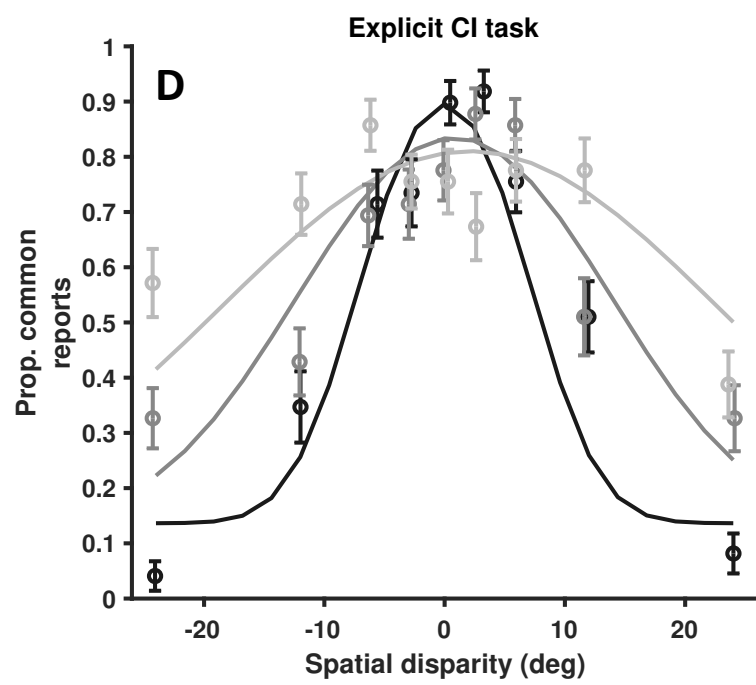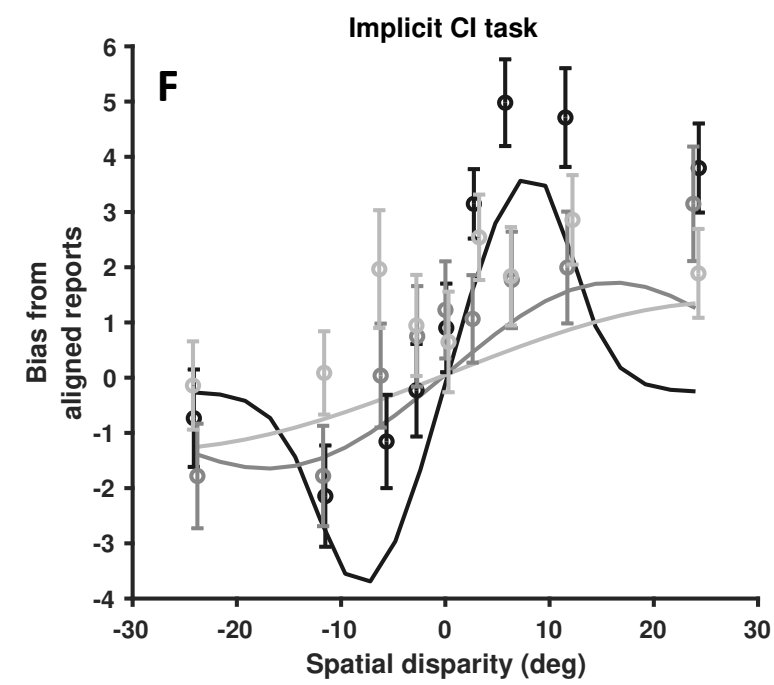

Supplement: supp [file elife-71866-supp-v1.zip]

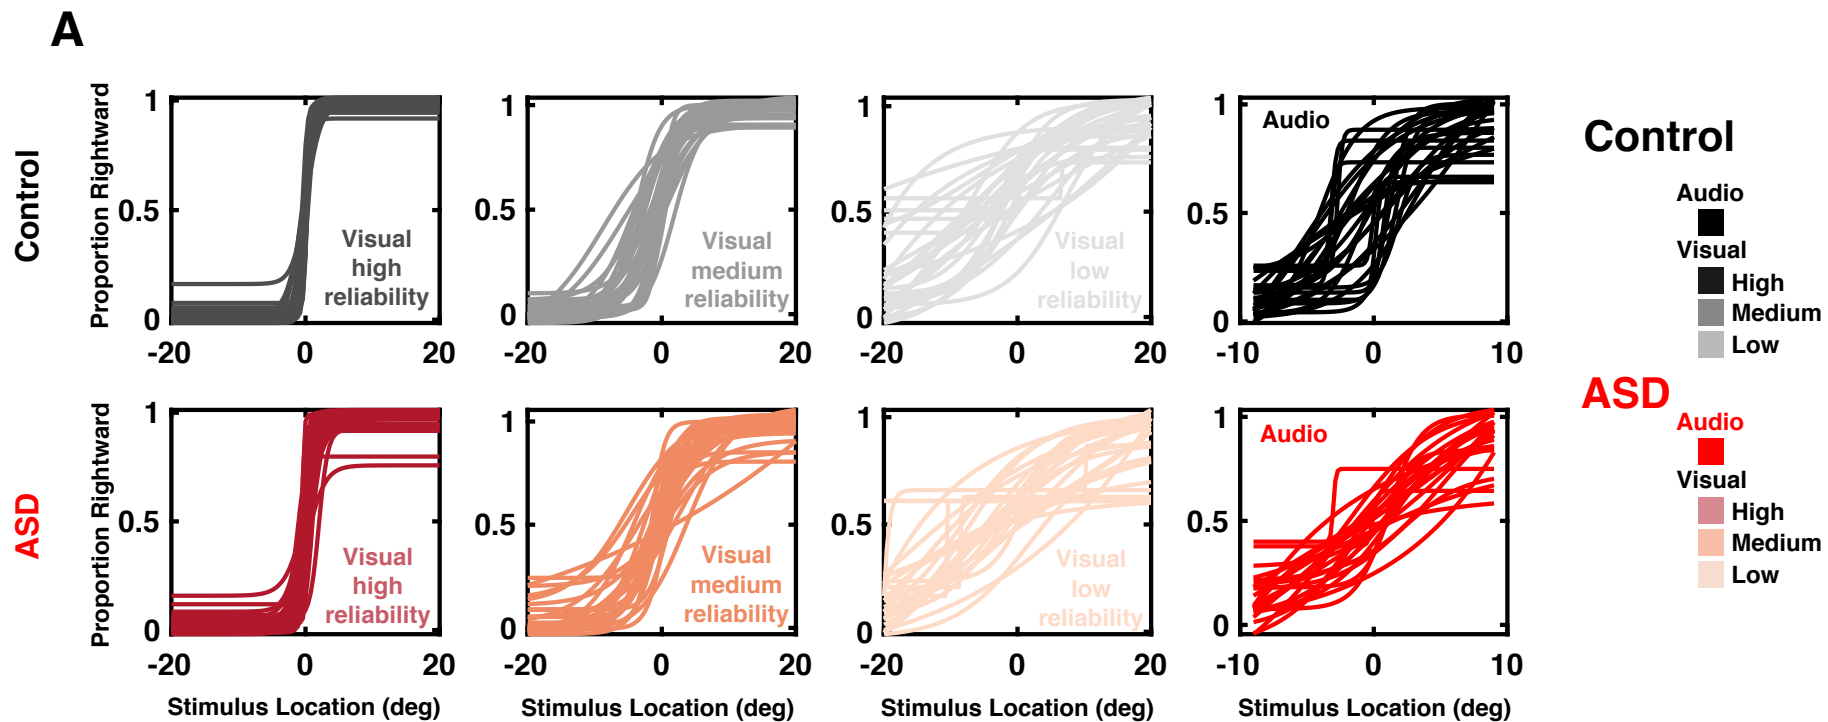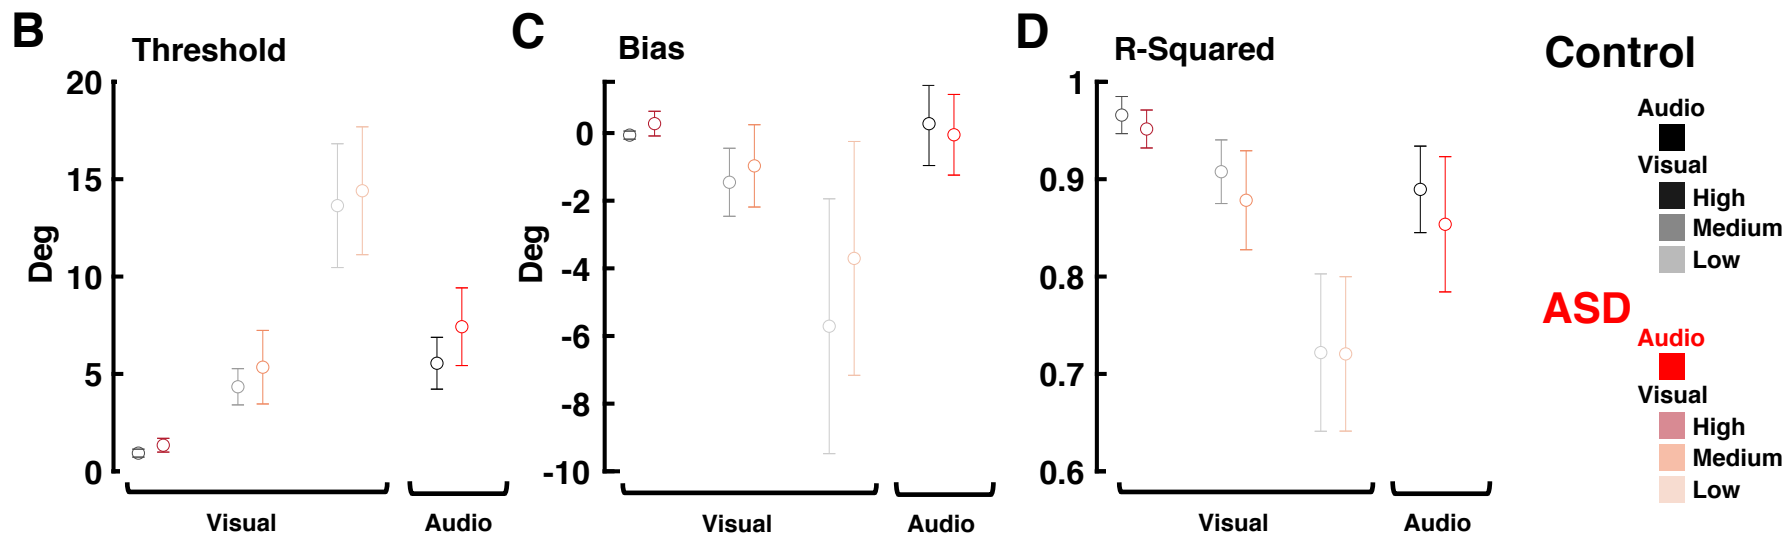

Supplement: supp [file elife-71866-supp-v1.zip]

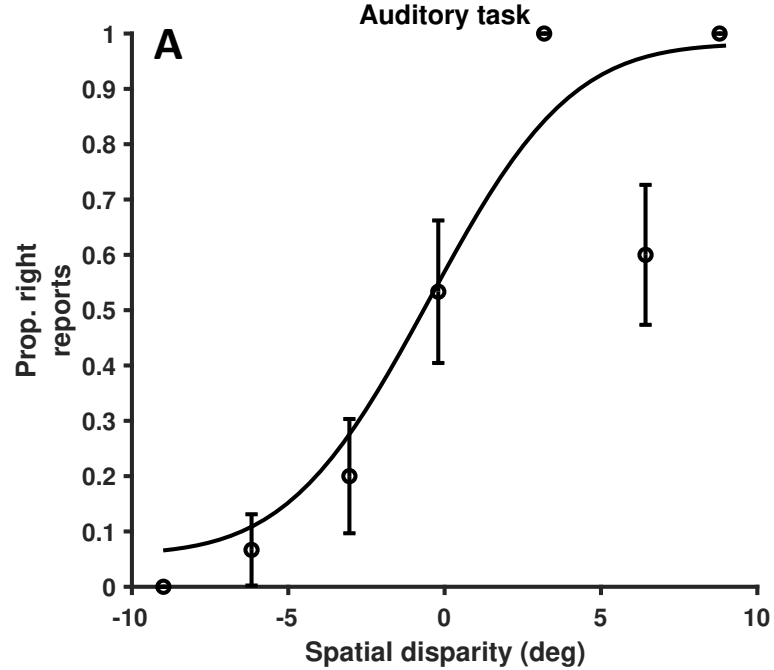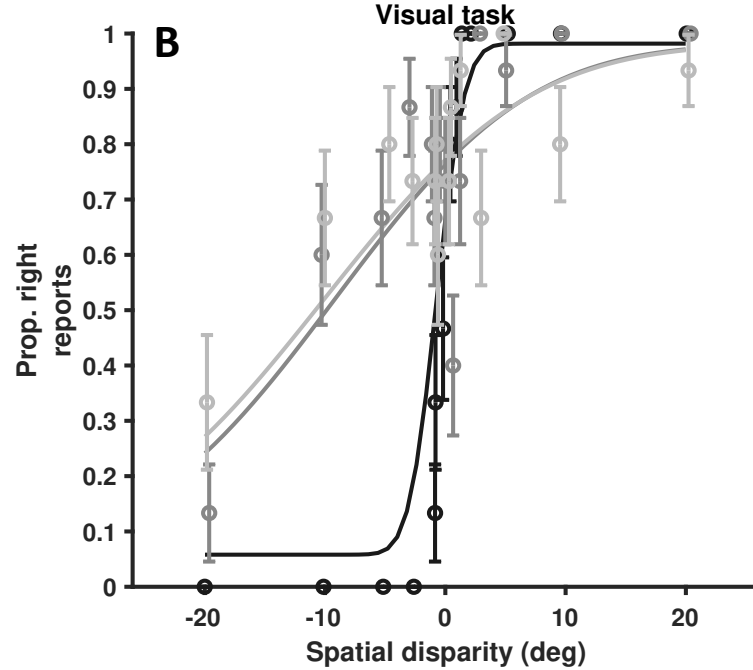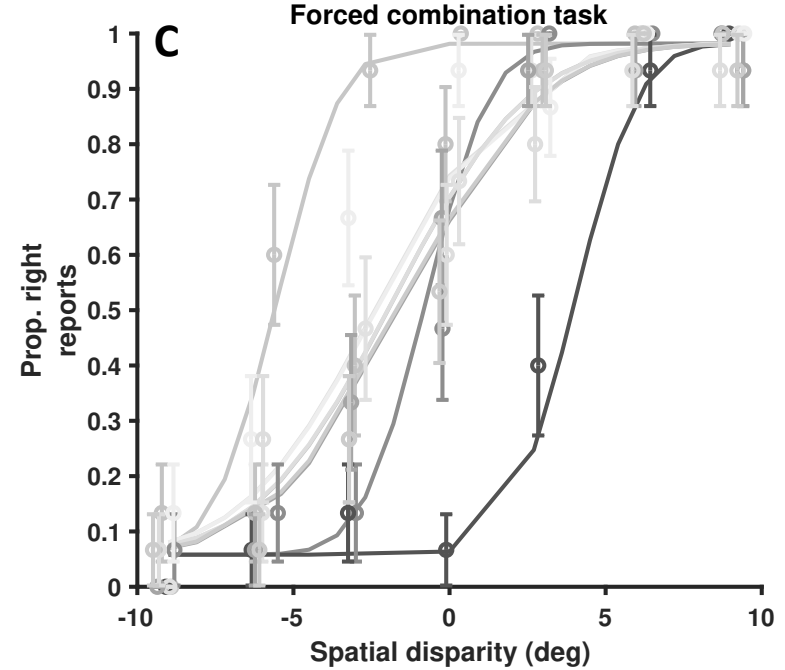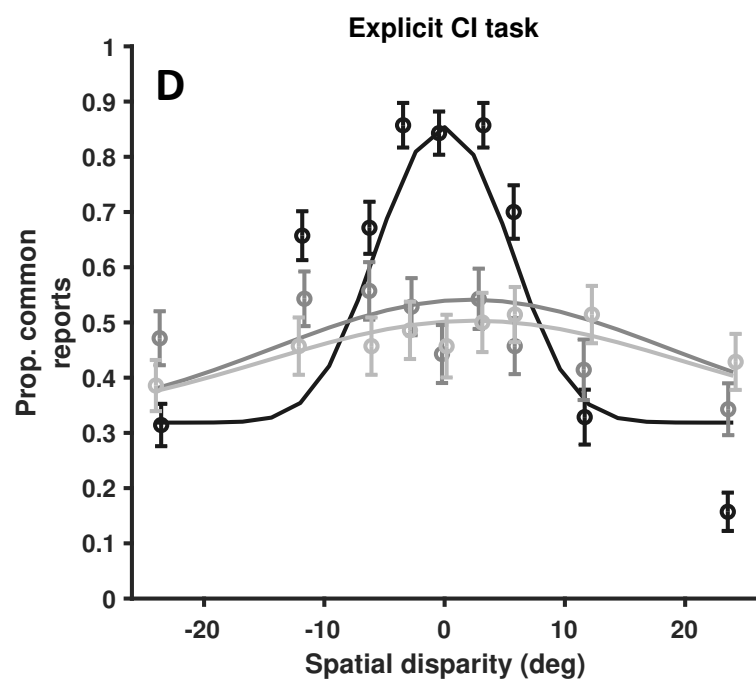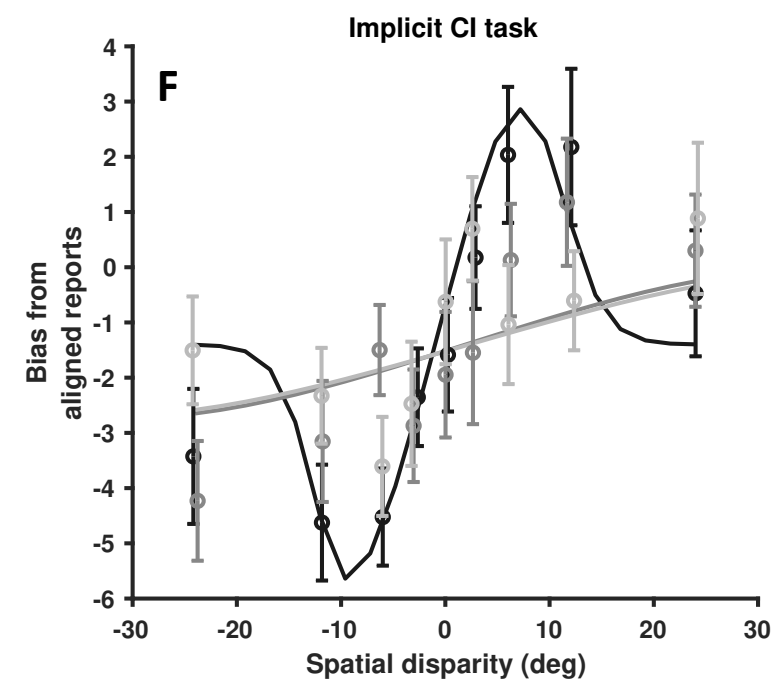

Supplement: supp [file elife-71866-supp-v1.zip]

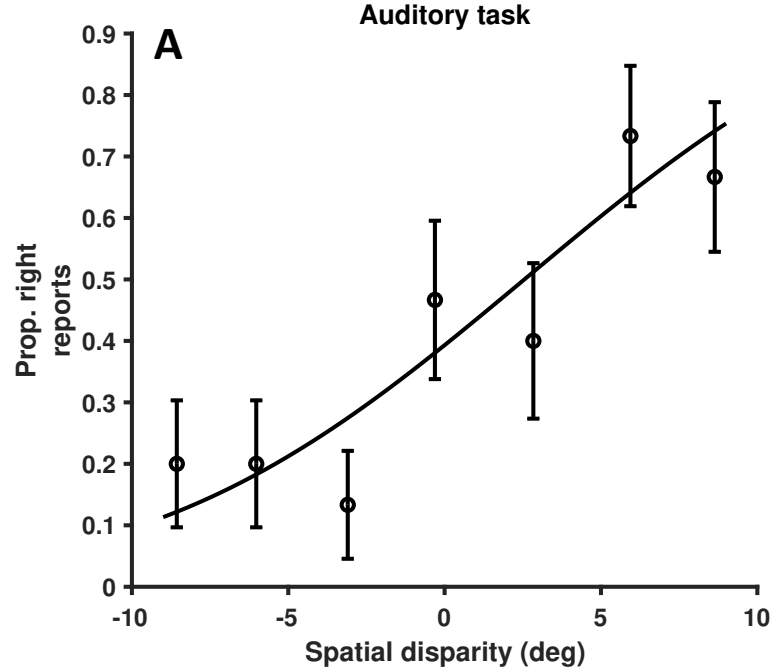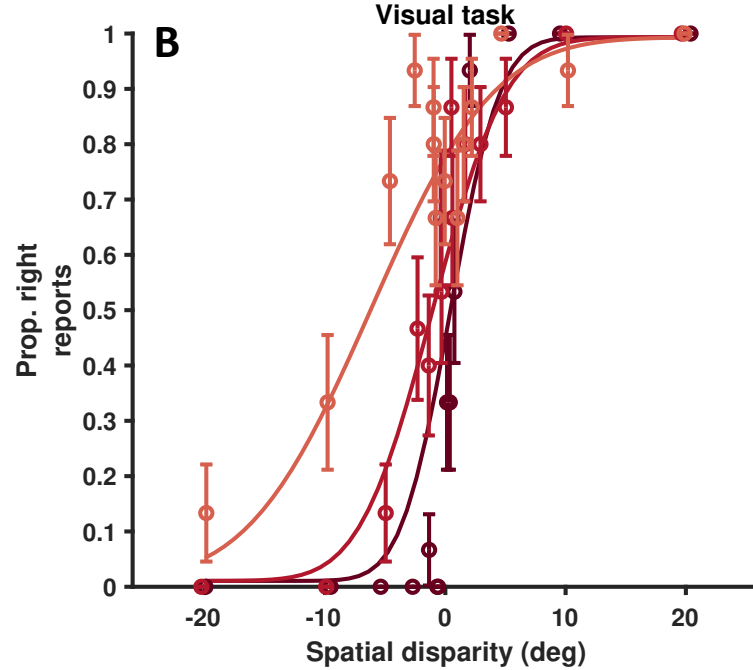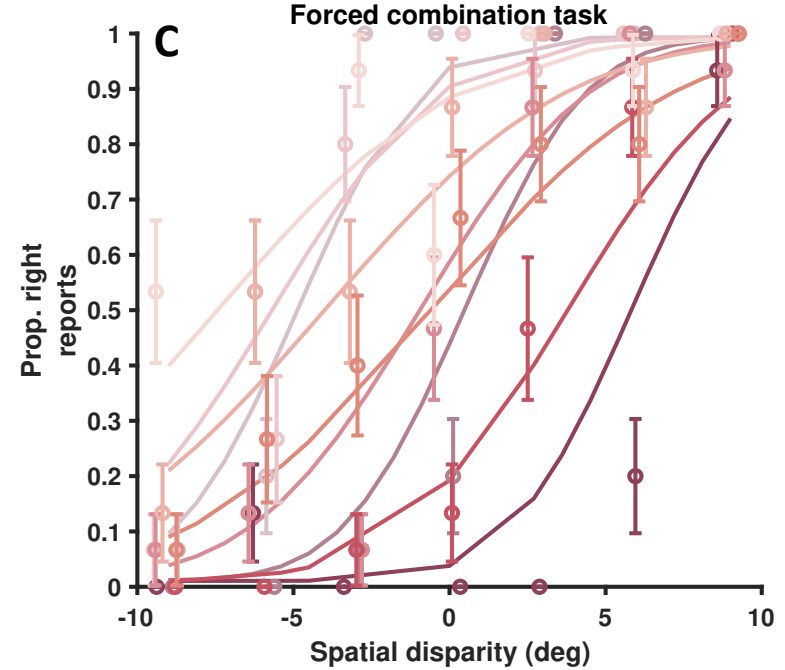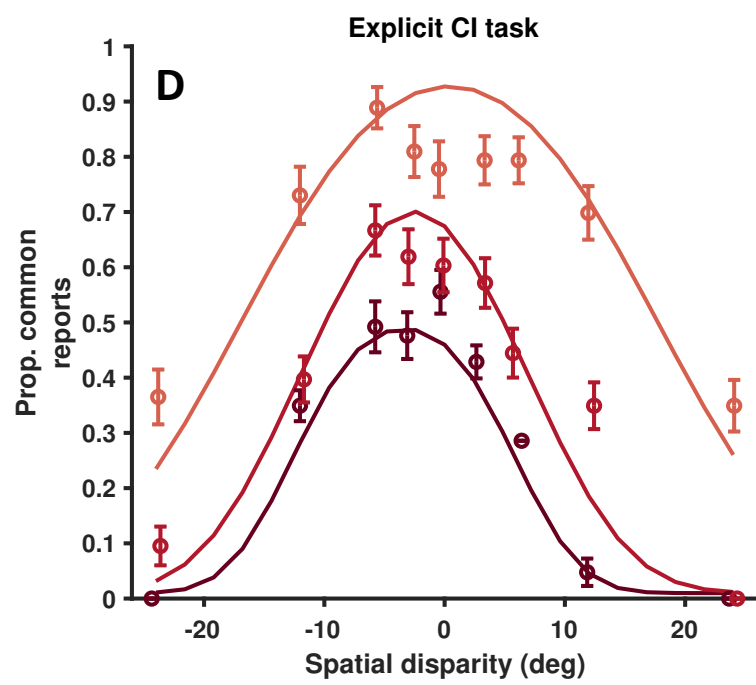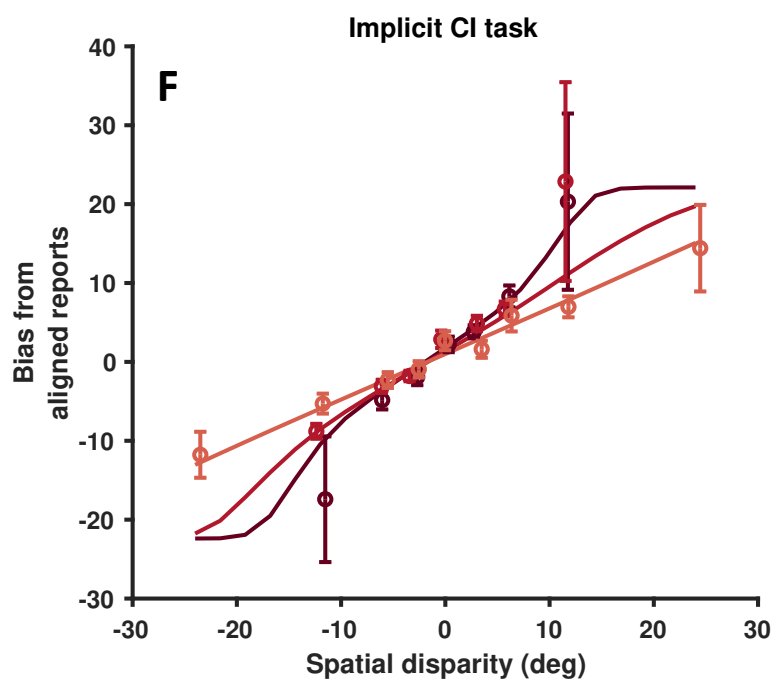

Supplement: supp [file elife-71866-supp-v1.zip]
